# Supplementary material for: Prognostic Factors for Recurrence and Progression in Korean Non-Muscle-Invasive Bladder Cancer Patients: A Retrospective, Multi-Institutional Study
Source: PubMed Central journal article supplement — Yonsei Med J. 2016 May 10;57(4):855–64. doi: 10.3349/ymj.2016.57.4.855 (PMC4951460; doi:10.3349/ymj.2016.57.4.855), 2016-05-10
Supplement: ymj-57-855-s001.pdf [file ymj-57-855-s001.pdf]

**Supplementary Table 1. Risk Group Stratification**

| <b>Risk group</b> | <b>Definition</b>                                                                                  |
|-------------------|----------------------------------------------------------------------------------------------------|
| Low               | Single, less than 3 cm, Ta, low grade tumor                                                        |
| Intermediate      | Multifocal and/or large size ( $\geq 3$ cm) low grade Ta tumor                                     |
| High              | Any of the followings:<br>1) All T1 tumor<br>2) High grade Ta tumor<br>3) Carcinoma <i>in situ</i> |
