# Supplementary material for: Prognostic Factors for Recurrence and Progression in Korean Non-Muscle-Invasive Bladder Cancer Patients: A Retrospective, Multi-Institutional Study
Source: PubMed Central journal article supplement — Yonsei Med J. 2016 May 10;57(4):855–64. doi: 10.3349/ymj.2016.57.4.855 (PMC4951460; doi:10.3349/ymj.2016.57.4.855), 2016-05-10
Supplement: ymj-57-855-s002.pdf [file ymj-57-855-s002.pdf]

**Supplementary Table 2.** Comparative Analysis Results of Variables among Risk Groups

| Variables                                         | Low risk group<br>(n=550) | Intermediate risk group<br>(n=429) | High risk group<br>(n=1433) | p value |
|---------------------------------------------------|---------------------------|------------------------------------|-----------------------------|---------|
| Clinical parameters                               |                           |                                    |                             |         |
| Age, yr, median (IQR)                             | 64.0 (54.9–71.0)          | 66.2 (57.1–72.0)                   | 67.1 (58.5–73.2)            | <0.001  |
| <65, n (%)                                        | 297 (54.0)                | 192 (44.8)                         | 610 (42.6)                  | <0.001  |
| ≥65, n (%)                                        | 253 (46.0)                | 237 (55.2)                         | 823 (57.4)                  |         |
| Gender, n (%)                                     |                           |                                    |                             | 0.749   |
| Male                                              | 417 (84.1)                | 335 (84.2)                         | 1095 (82.9)                 |         |
| Female                                            | 79 (15.9)                 | 63 (15.8)                          | 226 (17.1)                  |         |
| Preoperative urine cytology, n (%)                |                           |                                    |                             | <0.001  |
| Negative                                          | 335 (70.1)                | 267 (70.3)                         | 530 (40.3)                  |         |
| Atypical cells                                    | 92 (19.2)                 | 67 (17.6)                          | 290 (22.1)                  |         |
| Positive for malignant cells                      | 51 (10.7)                 | 46 (12.1)                          | 495 (37.6)                  |         |
| Tumor morphology, n (%)                           |                           |                                    |                             | <0.001  |
| Papillary                                         | 517 (94.0)                | 370 (86.2)                         | 1173 (82.2)                 |         |
| Non-papillary (sessile/flat/mixed)                | 33 (6.0)                  | 59 (13.8)                          | 254 (17.8)                  |         |
| Pathological parameters                           |                           |                                    |                             |         |
| Muscle layer included, n (%)                      |                           |                                    |                             | <0.001  |
| Absent                                            | 419 (76.5)                | 278 (65.0)                         | 783 (54.7)                  |         |
| Present                                           | 129 (23.5)                | 150 (35.0)                         | 649 (45.3)                  |         |
| Postoperative parameters                          |                           |                                    |                             |         |
| Immediate intravesical chemotherapy, n (%)        |                           |                                    |                             | 0.029   |
| No                                                | 465 (84.5)                | 354 (82.5)                         | 1139 (79.5)                 |         |
| Yes                                               | 85 (15.5)                 | 75 (17.5)                          | 293 (20.5)                  |         |
| Additional intravesical chemotherapy, n (%)       |                           |                                    |                             | 0.021   |
| No                                                | 474 (86.3)                | 343 (80.0)                         | 1170 (82.0)                 |         |
| Yes                                               | 75 (13.7)                 | 86 (20.0)                          | 256 (18.0)                  |         |
| BCG induction, n (%)                              |                           |                                    |                             | <0.001  |
| No                                                | 416 (75.6)                | 237 (55.2)                         | 460 (32.1)                  |         |
| Yes                                               | 134 (24.4)                | 192 (44.8)                         | 973 (67.9)                  |         |
| BCG maintenance, n (%)                            |                           |                                    |                             | <0.001  |
| No                                                | 417 (82.9)                | 263 (72.1)                         | 893 (66.0)                  |         |
| Yes (SWOG or monthly)                             | 86 (17.1)                 | 102 (27.9)                         | 460 (34.0)                  |         |
| Overall follow-up duration (months), median (IQR) | 38.5 (25–54)              | 37 (25–52.5)                       | 36 (25–51)                  | 0.893   |
| Median first time to recurrence (months)          | 11 (6–20)                 | 10 (5–20)                          | 9 (4–19)                    | 0.517   |
| Recurrence, n (%)                                 |                           |                                    |                             | <0.001  |
| No                                                | 403 (73.3)                | 291 (67.8)                         | 849 (59.4)                  |         |
| Yes                                               | 147 (26.7)                | 138 (32.2)                         | 581 (40.6)                  |         |
| Progression, n (%)                                |                           |                                    |                             | <0.001  |
| No                                                | 532 (97.4)                | 413 (96.7)                         | 1318 (92.4)                 |         |
| Yes                                               | 14 (2.6)                  | 14 (3.3)                           | 109 (7.6)                   |         |
| Muscle invasion                                   | 8                         | 11                                 | 60                          |         |
| Distant metastasis                                | 6                         | 3                                  | 49                          |         |

IQR, interquartile range; BCG, Bacillus Calmette-Guérin; SWOG, Southwest Oncology Group.
