# Supplementary material for: Prognostic Factors for Recurrence and Progression in Korean Non-Muscle-Invasive Bladder Cancer Patients: A Retrospective, Multi-Institutional Study
Source: PubMed Central journal article supplement — Yonsei Med J. 2016 May 10;57(4):855–64. doi: 10.3349/ymj.2016.57.4.855 (PMC4951460; doi:10.3349/ymj.2016.57.4.855), 2016-05-10
Supplement: ymj-57-855-s003.pdf [file ymj-57-855-s003.pdf]

**Supplementary Table 3.** Univariable and Multivariable Cox Regression Analyses Predicting Recurrence Free Survival in Low Risk Patients (n=550)

| Variables                                        | Univariable analysis   |         | Multivariable analysis |         |
|--------------------------------------------------|------------------------|---------|------------------------|---------|
|                                                  | Unadjusted HR (95% CI) | p value | Adjusted HR (95% CI)   | p value |
| Clinical parameters                              |                        |         |                        |         |
| Age, yrs ( $\geq 65$ vs. $< 65$ )                | 1.69 (1.22–2.35)       | 0.002   | 1.69 (1.22–2.34)       | 0.002   |
| Gender (female vs. male)                         | 1.06 (0.67–1.67)       | 0.804   |                        |         |
| Preoperative urine cytology (ref. negative)      |                        |         |                        |         |
| Atypical cells                                   | 1.09 (0.71–1.66)       | 0.698   |                        |         |
| Positive for malignant cells                     | 1.08 (0.64–1.85)       | 0.768   |                        |         |
| Tumor morphology (non-papillary vs. papillary)   | 0.75 (0.35–1.60)       | 0.454   |                        |         |
| Pathological parameters                          |                        |         |                        |         |
| Muscle layer included (present vs. absent)       | 1.03 (0.70–1.51)       | 0.873   |                        |         |
| Postoperative parameters                         |                        |         |                        |         |
| Immediate intravesical chemotherapy (yes vs. no) | 0.67 (0.40–1.13)       | 0.133   |                        |         |
| Induction BCG (yes vs. no)                       | 1.77 (1.26–2.49)       | 0.001   | 1.76 (1.25–2.48)       | 0.001   |
| Maintenance BCG (yes vs. no)                     | 1.39 (0.93–2.07)       | 0.109   |                        |         |

HR, hazard ratio; CI, confidence interval; BCG, Bacillus Calmette-Guérin.
