# Supplementary material for: Prognostic Factors for Recurrence and Progression in Korean Non-Muscle-Invasive Bladder Cancer Patients: A Retrospective, Multi-Institutional Study
Source: PubMed Central journal article supplement — Yonsei Med J. 2016 May 10;57(4):855–64. doi: 10.3349/ymj.2016.57.4.855 (PMC4951460; doi:10.3349/ymj.2016.57.4.855), 2016-05-10
Supplement: ymj-57-855-s004.pdf [file ymj-57-855-s004.pdf]

**Supplemental Table 4.** Univariable Cox Regression Analyses Predicting Progression Free Survival in Low Risk Patients (n=550)

| Variables                                        | Univariable analysis   |         |
|--------------------------------------------------|------------------------|---------|
|                                                  | Unadjusted HR (95% CI) | p value |
| Clinical parameters                              |                        |         |
| Age, yrs ( $\geq 65$ vs. $<65$ )                 | 5.57 (1.55–20.02)      | 0.008   |
| Gender (female vs. male)                         | 3.25 (0.97–10.96)      | 0.055   |
| Preoperative urine cytology (ref. negative)      |                        |         |
| Atypical cells                                   | 0.70 (0.15–3.19)       | 0.644   |
| Positive for malignant cells                     | 0.48 (0.06–3.79)       | 0.490   |
| Tumor morphology (non-papillary vs. papillary)   | 0.05 (0.00–3475.88)    | 0.591   |
| Pathological parameters                          |                        |         |
| Muscle layer included (present vs. absent)       | 1.20 (0.38–3.84)       | 0.756   |
| Postoperative parameters                         |                        |         |
| Immediate intravesical chemotherapy (yes vs. no) | 2.12 (0.59–7.64)       | 0.252   |
| Induction BCG (yes vs. no)                       | 2.27 (0.79–6.56)       | 0.129   |
| Maintenance BCG (yes vs. no)                     | 1.28 (0.35–4.64)       | 0.711   |

HR, hazard ratio; CI, confidence interval; BCG, Bacillus Calmette-Guérin.
